# Supplementary material for: Effect of molecular structure on the photochemical stability of acceptor and donor polymers used in organic solar cells
Source: Royal Society of Chemistry journal article supplement (doi:10.1039/d4ma00447g), 2024-01-01
Supplement: d4ma00447g1.pdf [file d4ma00447g1.pdf]

## Supplementary Information

### Effect of molecular structure on the photochemical stability of acceptor and donor polymers used in organic solar cells

Suraj Prasad<sup>a</sup>, Zewdneh Genene<sup>b</sup>, Cleber F.N. Marchiori<sup>a</sup>, Shivam Singh<sup>a</sup>, Leif K.E. Ericsson<sup>a</sup>, Ergang Wang<sup>b</sup>, C. Moyses Araujo<sup>a</sup>, Ellen Moons<sup>a\*</sup>

<sup>a</sup>Department of Engineering and Physics, Karlstad University, SE-65188 Karlstad, Sweden.

<sup>b</sup>Department of Chemistry and Chemical Engineering, Chalmers University of Technology, SE-412 96 Göteborg, Sweden.

\* Corresponding author (e-mail: ellen.moons@kau.se)

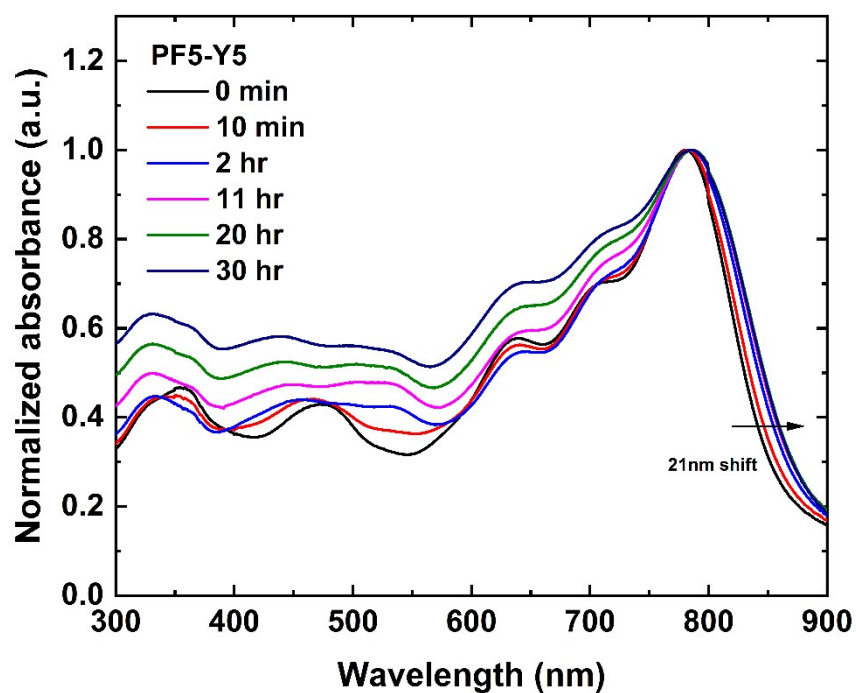

**Figure S1:** Normalized absorption spectra of PF5-Y5 exposed in ambient air for 0 min, 10 min, 2 hr, 11 hr, 20 hr, and 30 hr under AM 1.5 (one-sun-equivalent illumination).

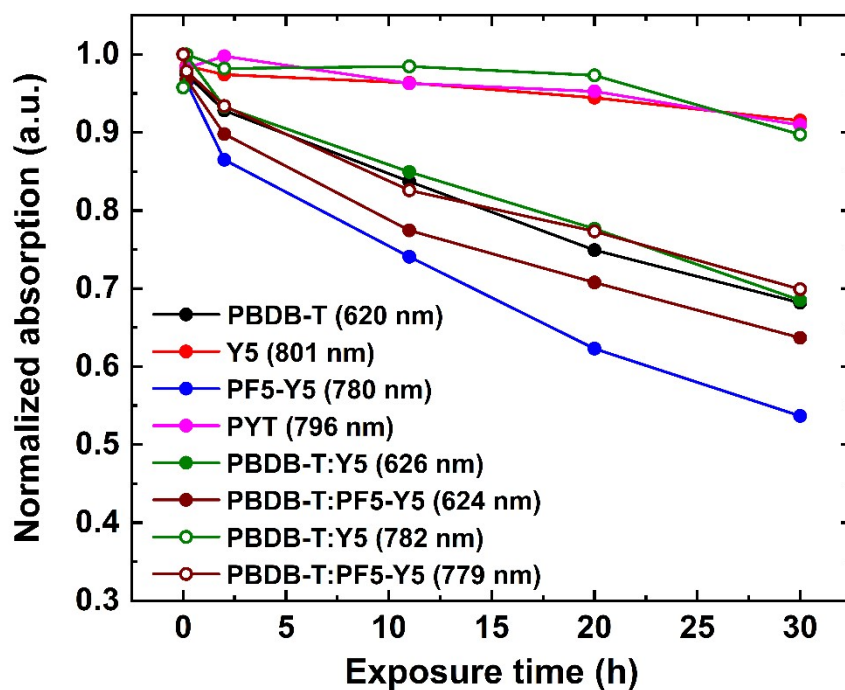

**Figure S2:** The relative change in absorbance of PBDB-T, Y5, PF5-Y5, PYT, PBDB-T:Y5 (1:0.75), and PBDB-T:PF5-Y5 (1:0.75) films as a function of exposure time.

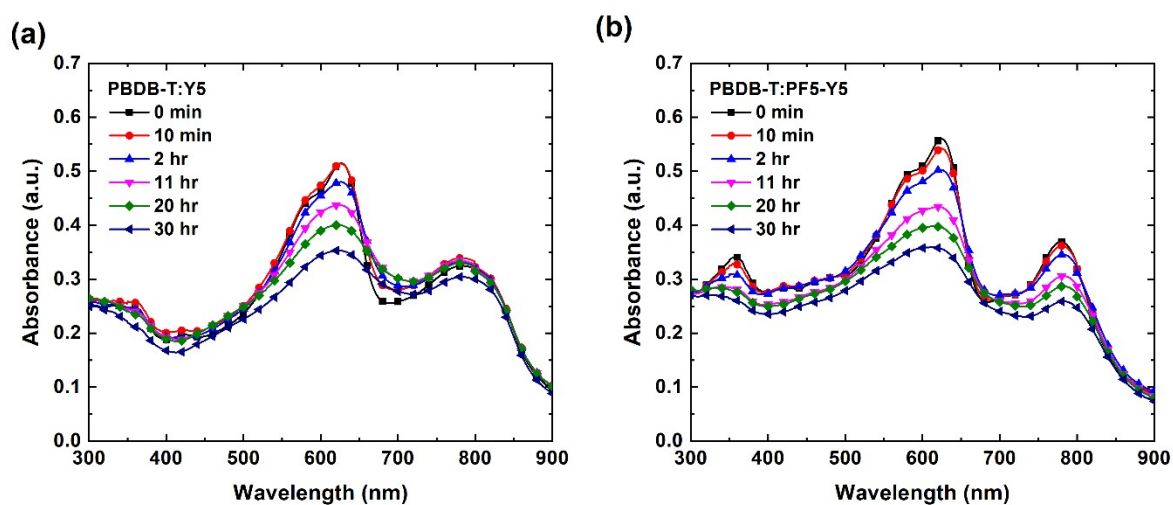

**Figure S3:** UV-vis spectra of (a) PBDB-T:Y5 (1:0.75), and (b) PBDB-T:PF5-Y5 (1:0.75) films exposed in ambient air for 0 min, 10 min, 2 hr, 11 hr, 20 hr, and 30 hr under AM 1.5 (one-sun-equivalent illumination).

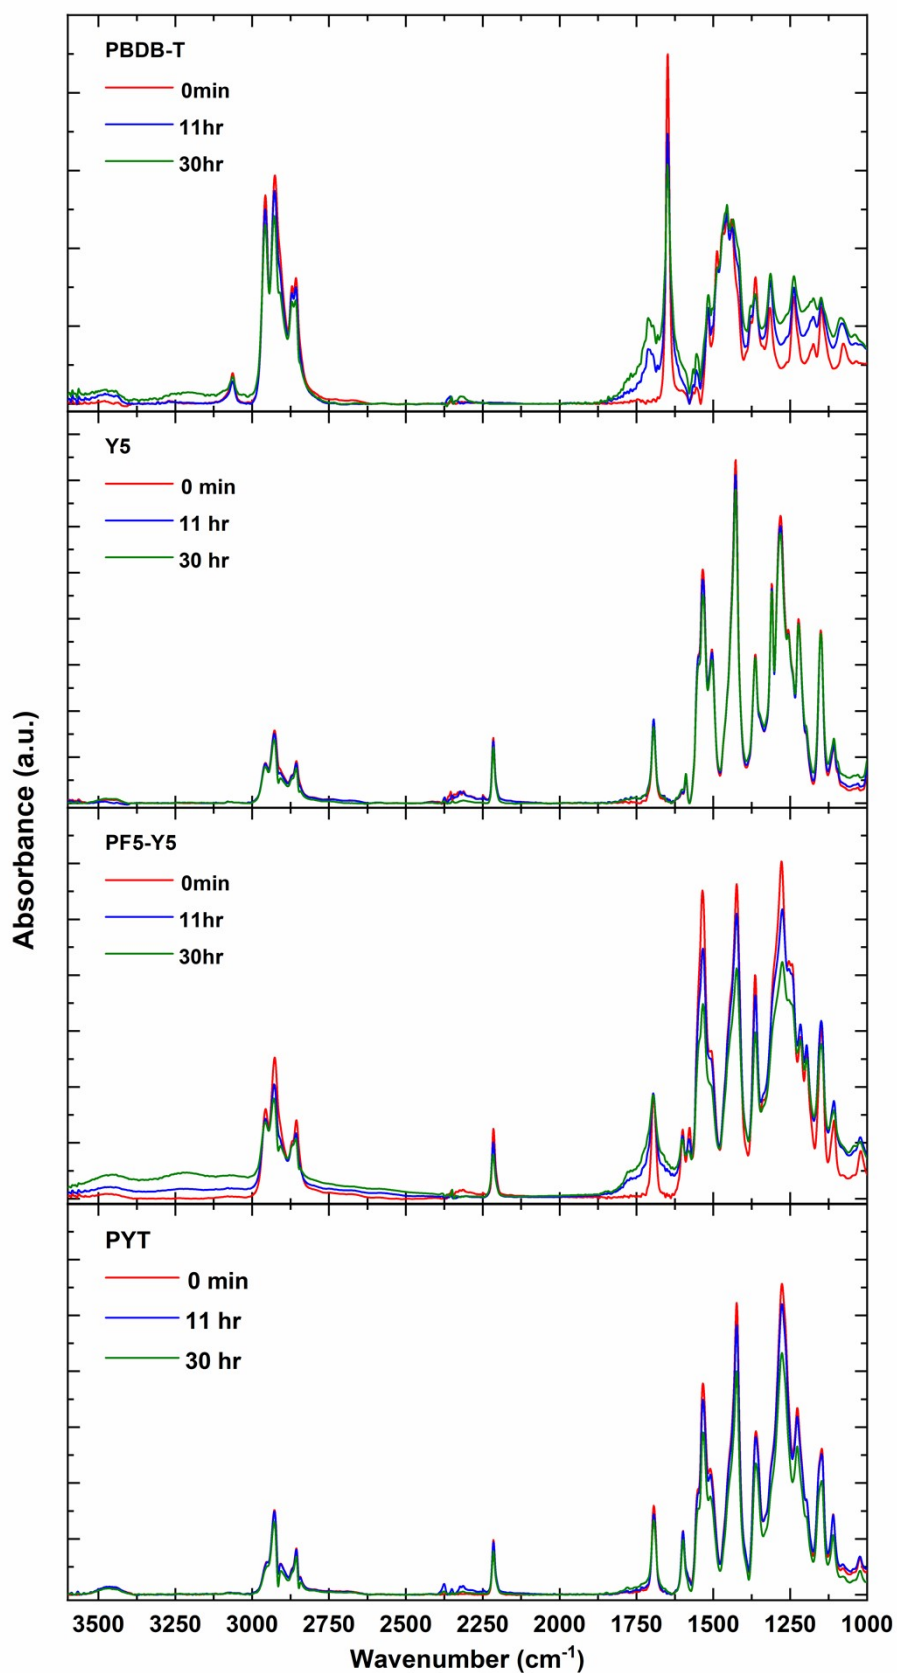

**Figure S4:** The wide FTIR spectra of PBDB-T, Y5, PF5-Y5, and PYT films, unexposed (0 min) and after exposure to light in air for exposure times 11 hr and 30 hr.

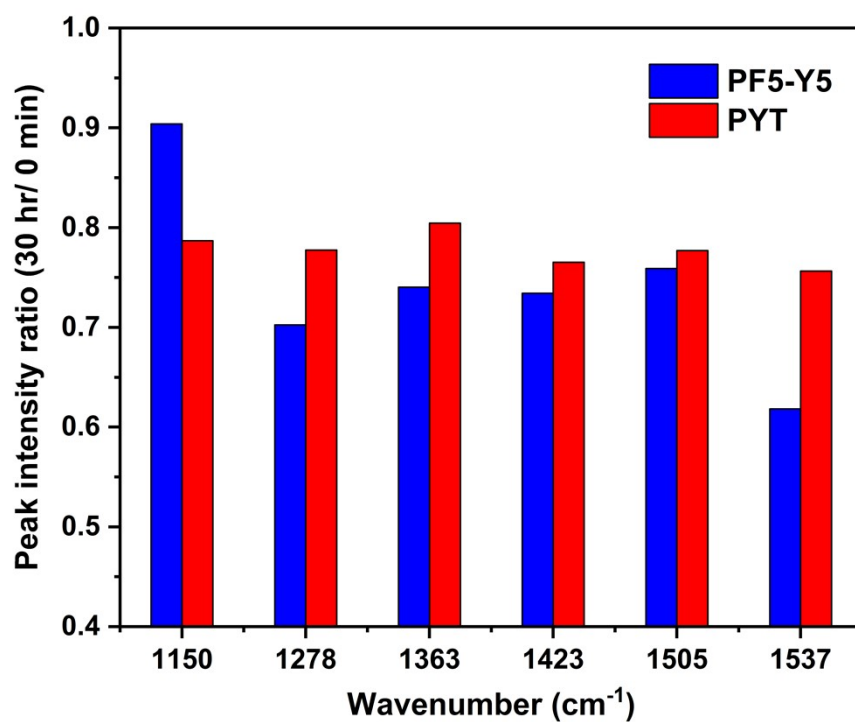

**Figure S5:** The peak intensity ratio (30 hr/0 min) for selected IR peaks of PF5-Y5 and PYT, extracted from figures 2c and 2d.

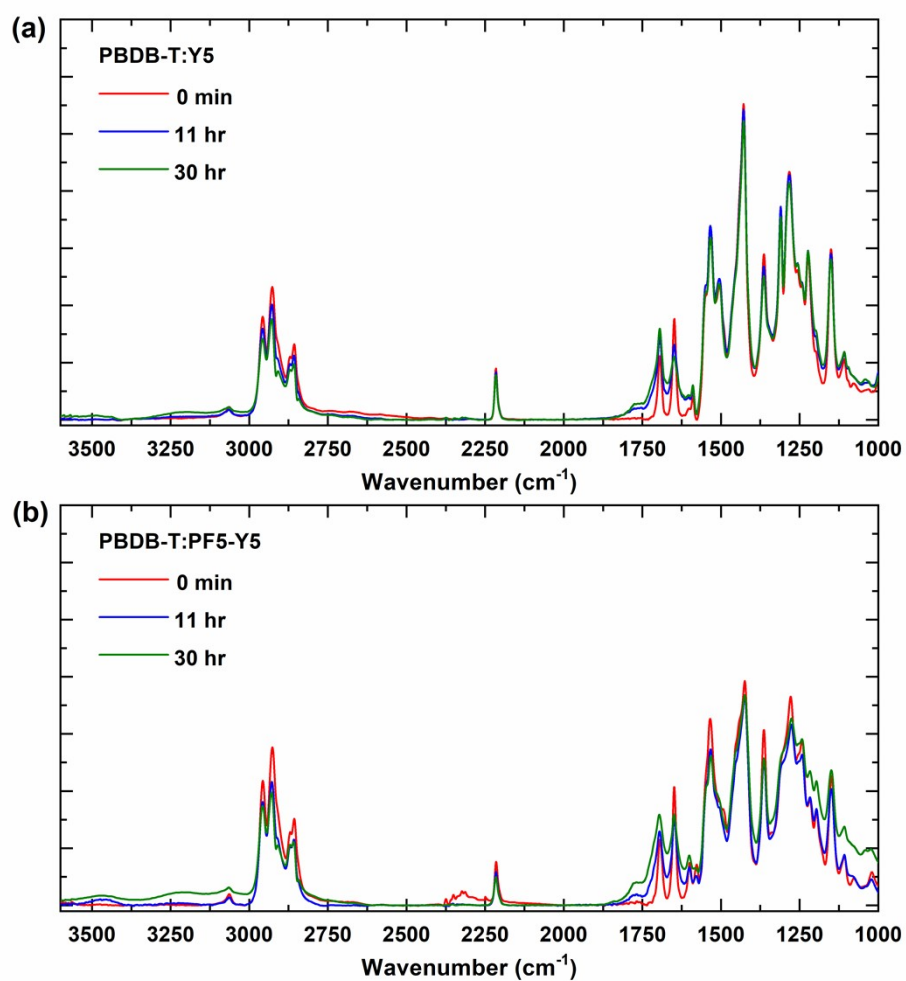

**Figure S6:** FTIR absorption spectra of PBDB-T:Y5 (1:0.75), and PBDB-T:PF5-Y5 (1:0.75), unexposed (0 min) and after exposure to light in air for exposure times 11 hr, and 30 hr.

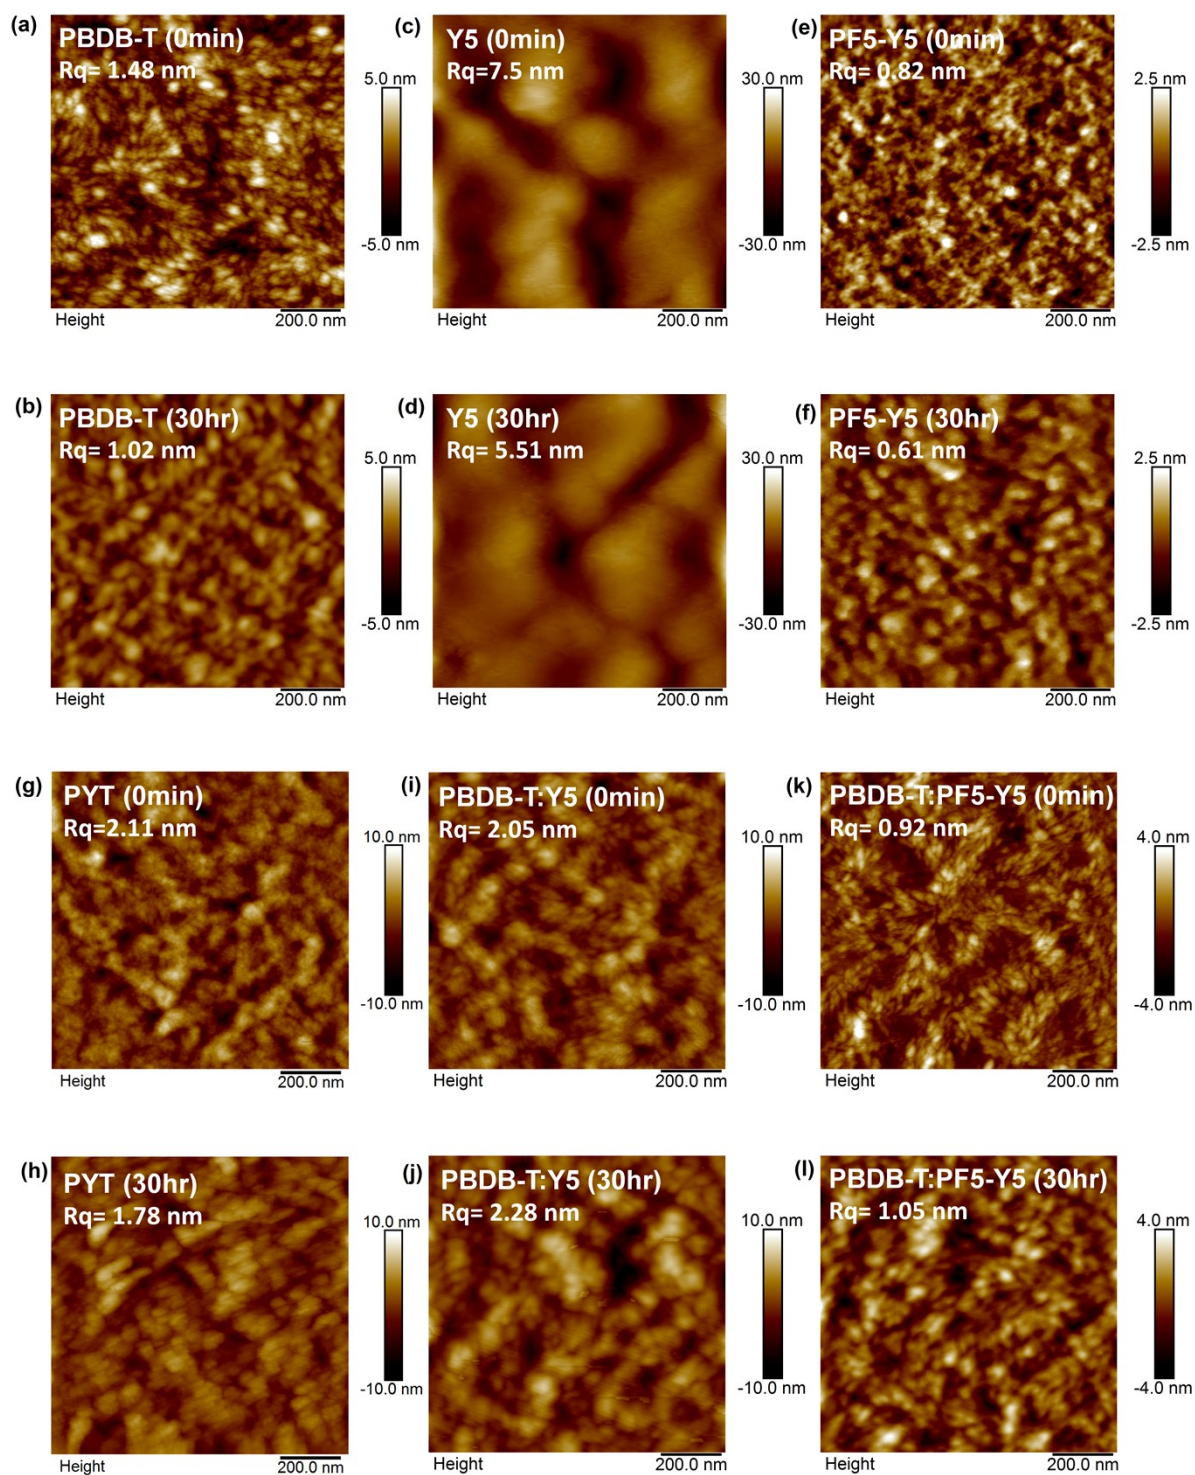

**Figure S7:** AFM images ( $1 \mu\text{m} \times 1 \mu\text{m}$ ) of spin coated PBDB-T, Y5, PF5-Y5, PYT, PBDB-T:Y5 (1:0.75), and PBDB-T:PF5-Y5 (1:0.75) films for 0 hr and 30 hr exposure times.

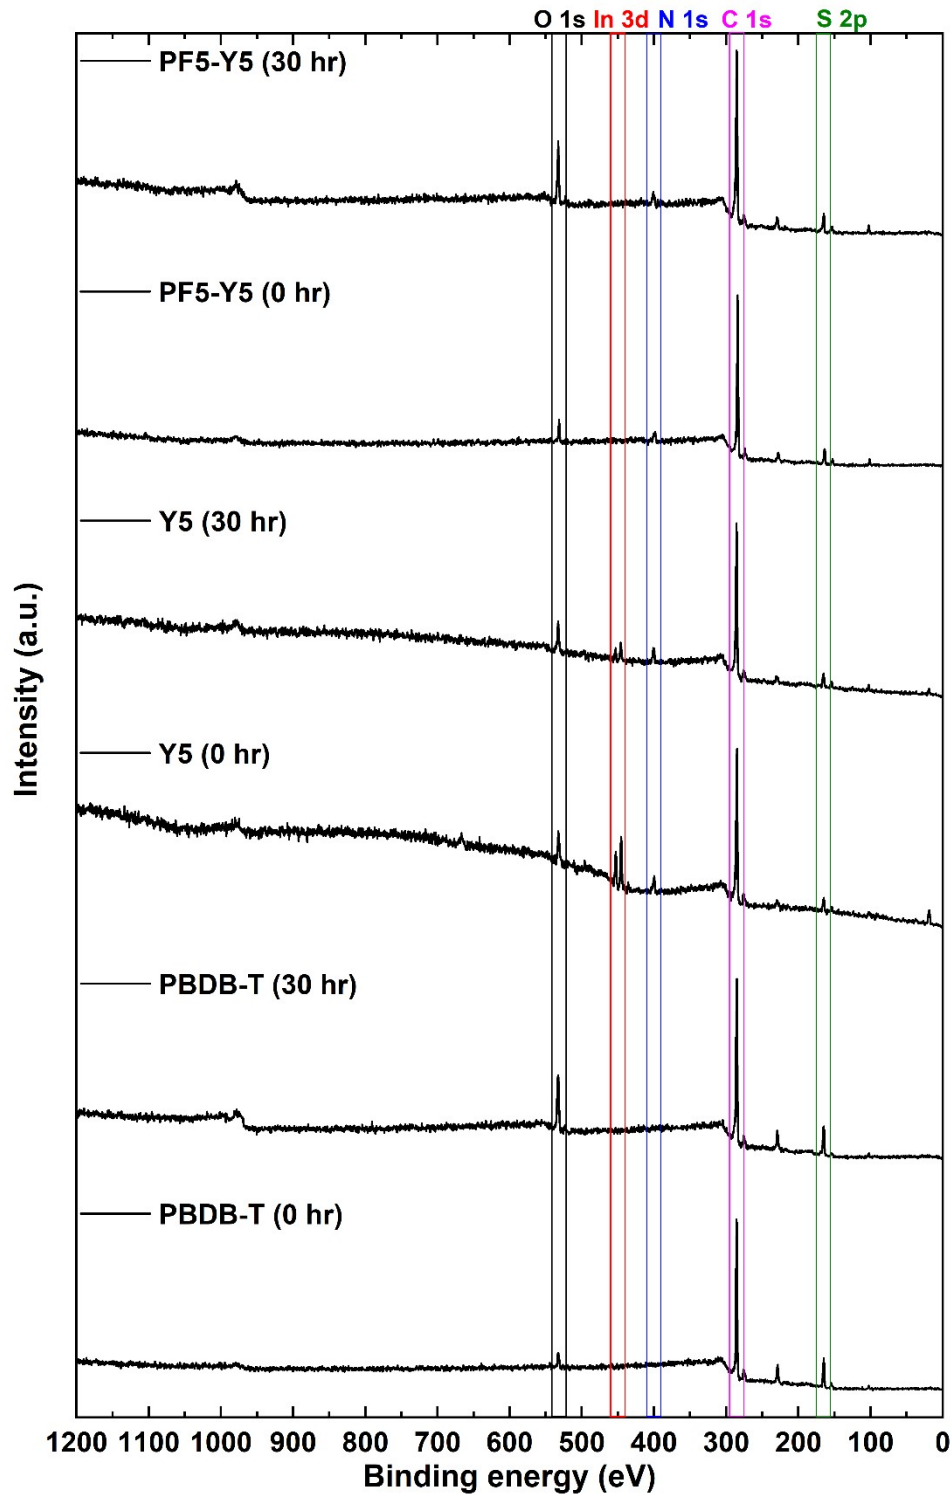

**Figure S8:** In-house XPS survey spectra of PBDB-T (bottom), Y5 (middle), and PF5-Y5 (top) for 0 hr and 30 hr under AM 1.5 solar simulator in ambient conditions. Apart from the assigned peak, smaller peaks in the spectrum are due to S 2s (229 eV), In 4d (19 eV) from the ITO substrate and traces of Si 2p (102 eV) and Si 2s (153 eV).

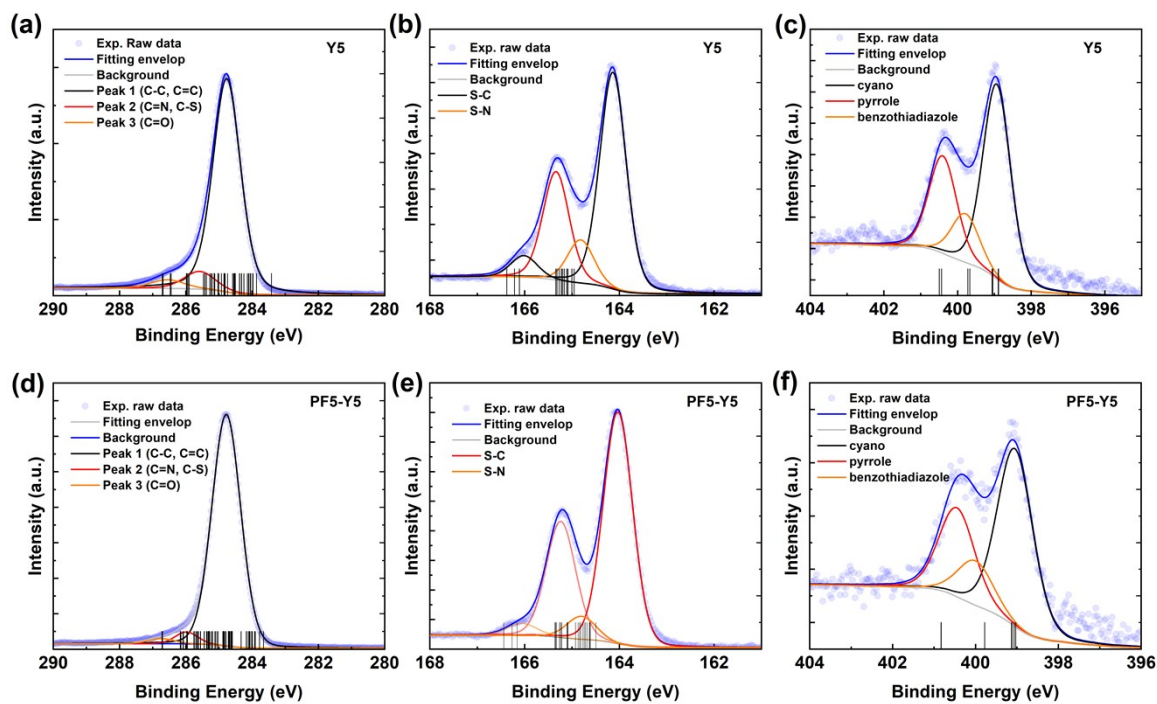

**Figure S9:** High-resolution and calculated XPS spectra of Y5 and PF5-Y5 (C1s, S2p, and N1s) for unexposed (0 hr) samples. The excitation photon energies used for C 1s, S 2p, and N 1s are 350 eV, 225 eV, and 465 eV.



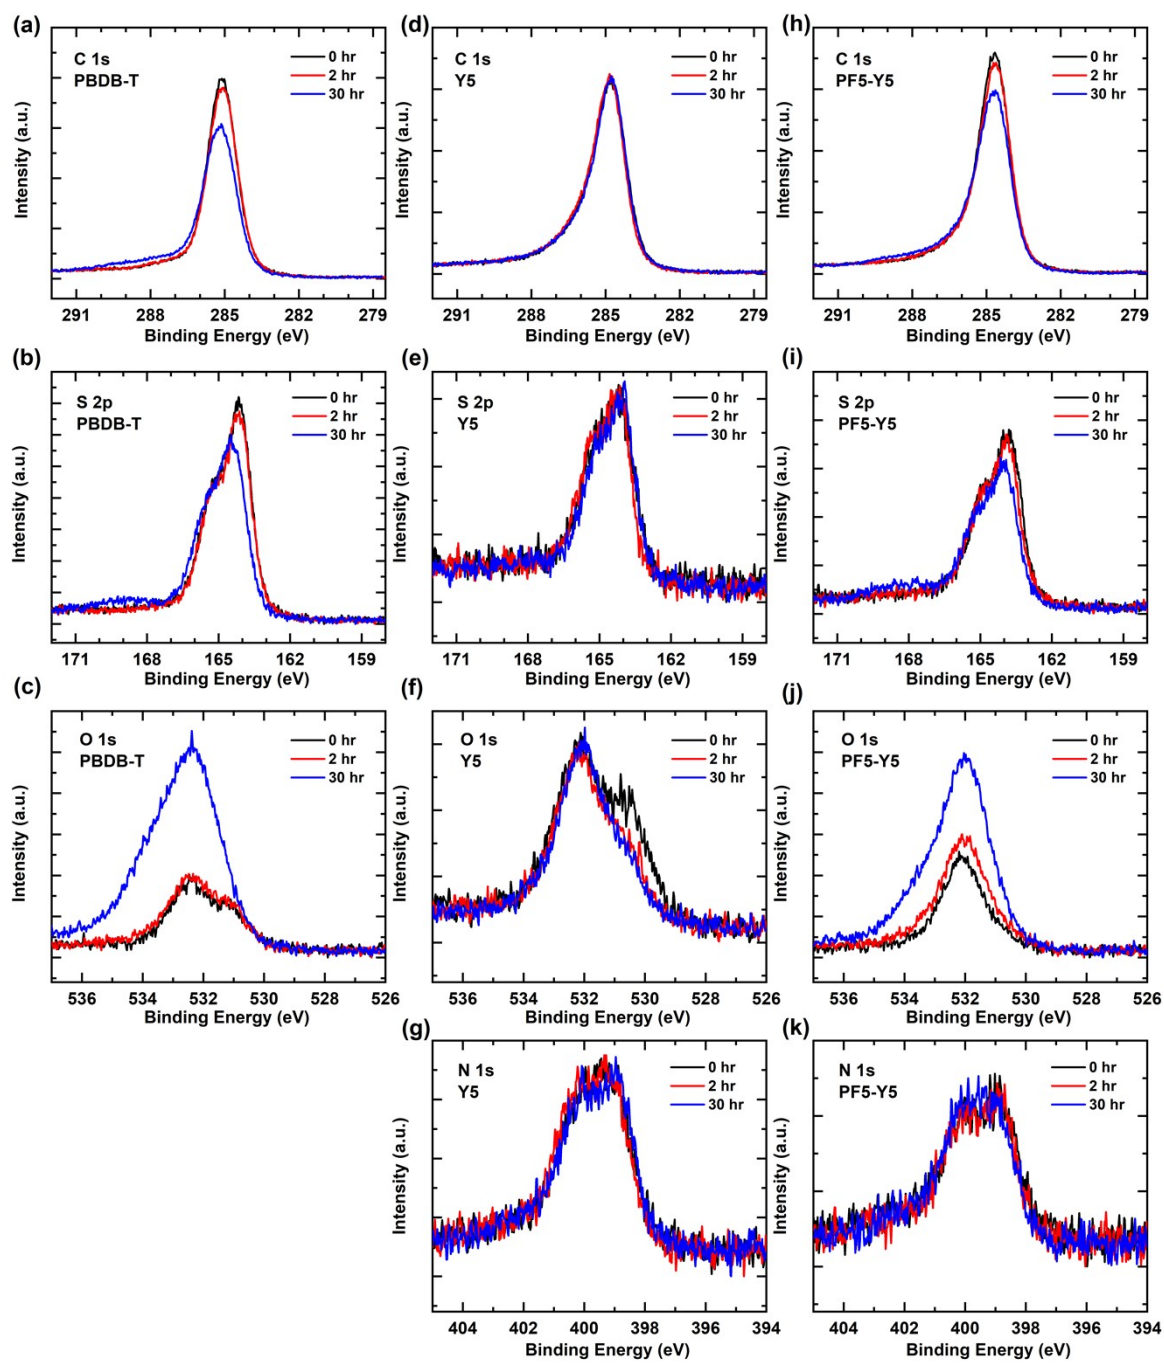

**Figure S10:** In-house XPS spectra of PBDB-T (left), Y5 (middle) and PF5-Y5 (right) for 0 hr and 30 hr of O 1s and N 1s under AM 1.5 solar simulator in ambient conditions.

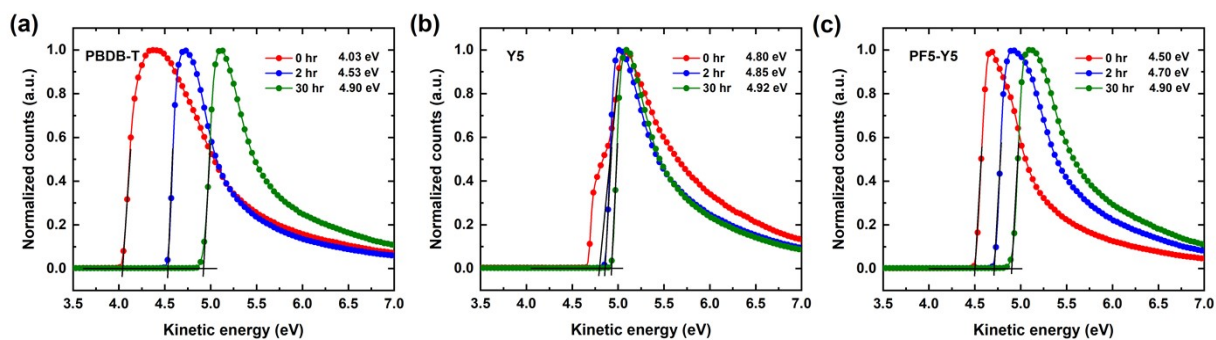

**Figure S11:** The secondary electron cut-off of (a) PBDB-T, (b) Y5, and (c) PF5-Y5 upon exposure for 0 hr, 2 hr, and 30 hr, measured by UV photoelectron spectroscopy.

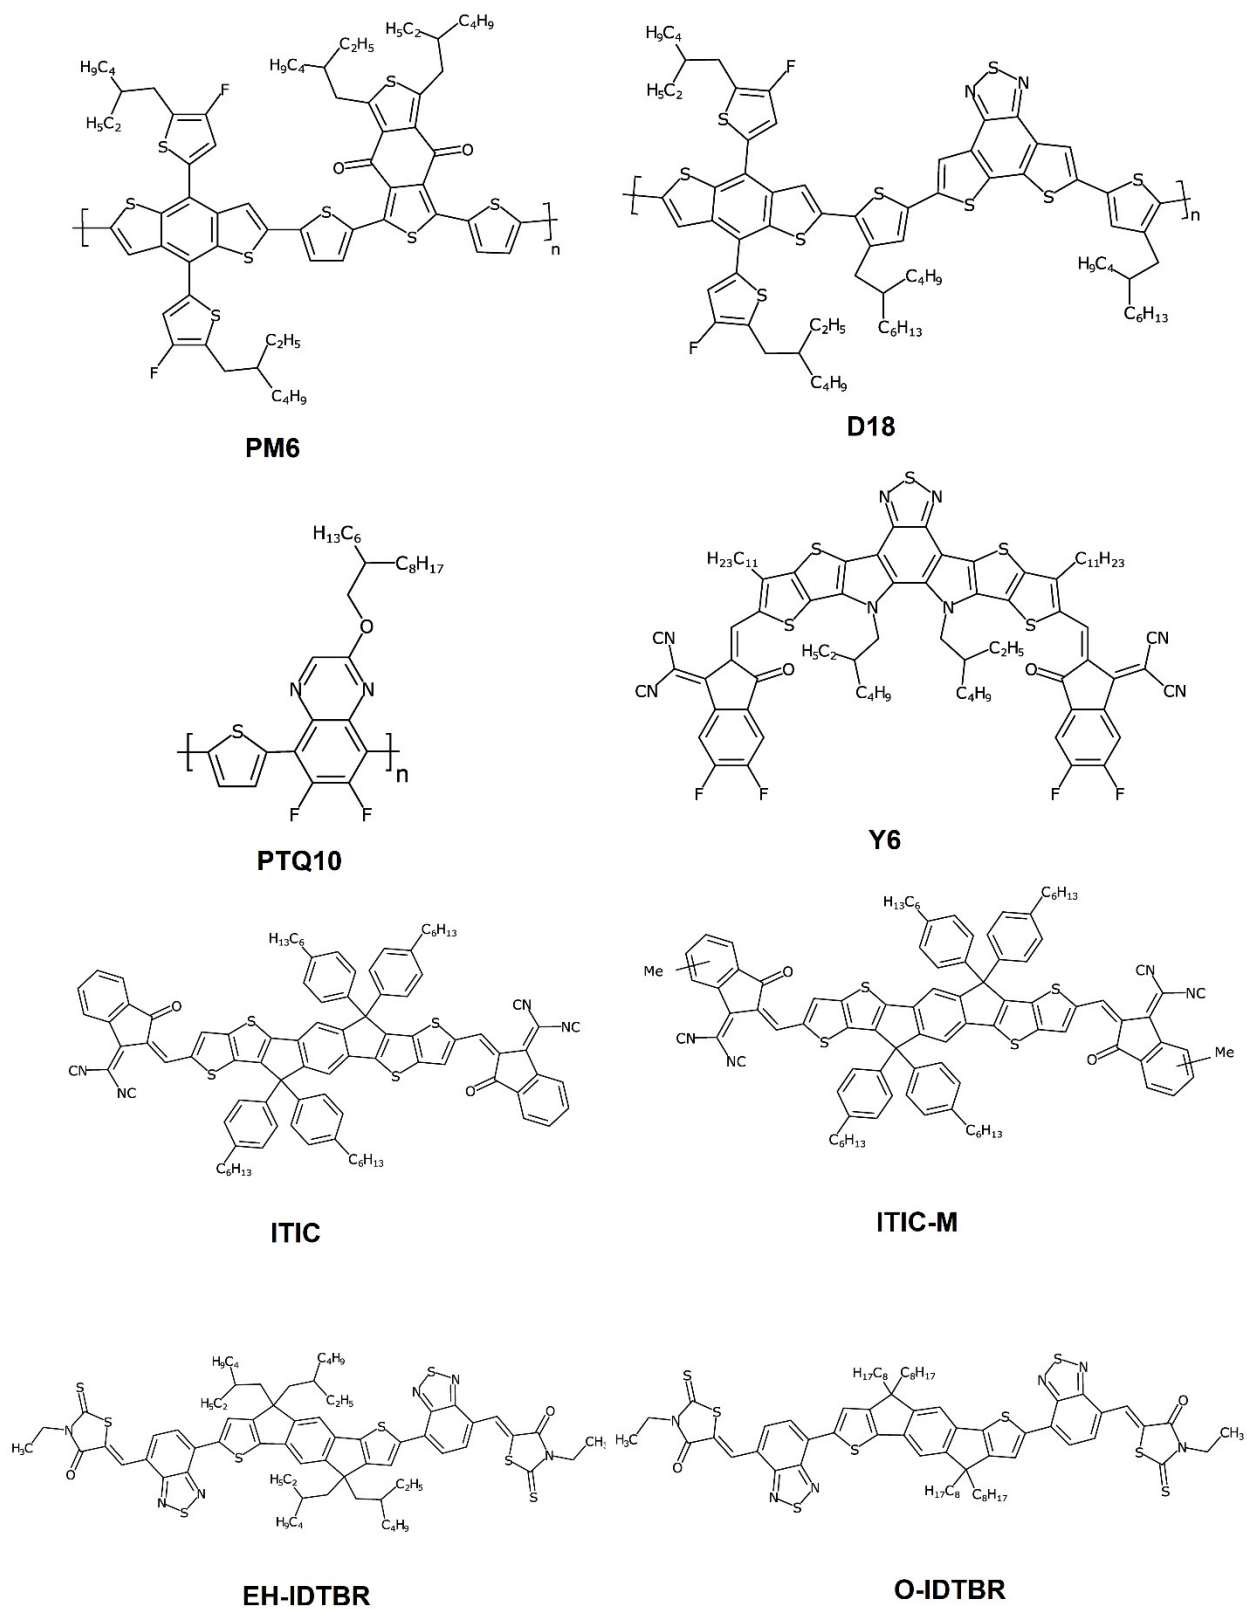

**Figure S12:** Molecular structures of donor polymers PM6, D18, and PTQ10, and NFAs Y6, ITIC, ITIC-M, EH-IDTBR, and O-IDTBR.

**Table S1:** Calculated Y5 C1s core orbitals.

| Energy (eV) | Functional Group | Core Orbital                                                                         |
|-------------|------------------|--------------------------------------------------------------------------------------|
| 286.70      | -C=O             | 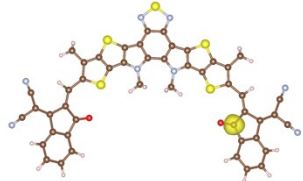   |
| 286.47      | -C-C(CN)2        |    |
| 285.98      | -C-C(CN)2        |    |
| 285.93      | vinylene         |   |
| 285.47      | (CN)2-C-C-C-C=O  |  |
| 285.43      | C-S              |  |
| 285.28      | C-N pyrrole      |  |
| 285.23      | C=N BT           |  |
| 285.15      | C≡N              |  |

Y5 N1s core orbitals.

| Energy (eV)                          | Functional Group | Core Orbital                                                                       |
|--------------------------------------|------------------|------------------------------------------------------------------------------------|
| 400.50<br>400.44                     | N-C (pyrrole)    | 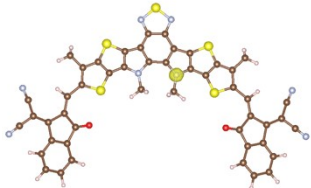 |
| 399.72<br>399.67                     | N=C (BT)         |  |
| 399.07<br>399.05<br>398.90<br>398.89 | N≡C (cyano)      |  |

Y5 S2p core orbitals.

| Energy (eV)                                              | Functional Group | Core Orbital                                                                         |
|----------------------------------------------------------|------------------|--------------------------------------------------------------------------------------|
| 166.38<br>166.21<br>166.11                               | S-N (BT)         | 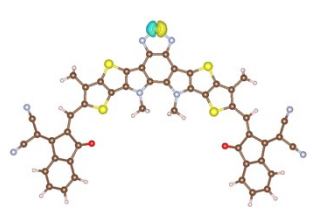 |
| 165.34<br>165.32<br>165.22<br>165.19<br>165.11<br>165.08 | S-C (outer)      |  |
| 165.27<br>165.22<br>165.16<br>165.11<br>165.00<br>164.95 | S-C (inner)      |  |

**Table S2:** Calculated PF5-Y5 C1s core orbitals.

| Energy (eV)                                                               | Functional Group     | Core Orbital                                                                         |
|---------------------------------------------------------------------------|----------------------|--------------------------------------------------------------------------------------|
| 281.32                                                                    | -C=O                 | 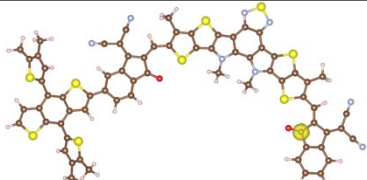   |
| 280.77                                                                    | -C-C(CN)2            |    |
| 280.687                                                                   | C-N pyrrole          |    |
| 280.547                                                                   | -C(CN)2              |   |
| 280.356                                                                   | C=N BT               |  |
| 280.296<br>280.292<br>280.247<br>280.222                                  | -C≡N                 |  |
| 280.249<br>280.244                                                        | -C-N (pyrrole)       |  |
| 280.161<br>280.153<br>280.049<br>280.045<br>279.909<br>279.907<br>279.880 | -C-S (Y5 co-monomer) |  |

|                               |                     |                                                                                    |
|-------------------------------|---------------------|------------------------------------------------------------------------------------|
| 279.878                       |                     |                                                                                    |
| 279.976<br>279.963            | vinylene            | 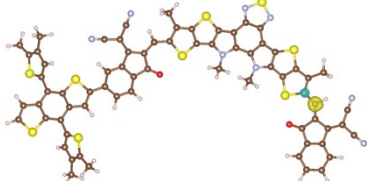 |
| 279.822<br>279.721<br>279.663 | -C-S<br>(BDT fused) |  |
| 279.460<br>279.435            | -C-S<br>(BDT side)  |  |

PF5-Y5 N1s core orbitals.

| Energy (eV)                          | Functional Group | Core Orbital                                                                         |
|--------------------------------------|------------------|--------------------------------------------------------------------------------------|
| 400.83                               | N-C (pyrrole)    | 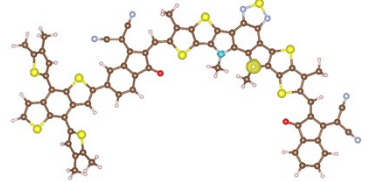  |
| 399.73                               | N=C (BT)         |  |
| 399.13<br>399.12<br>399.07<br>399.03 | N≡C (cyano)      |  |

PF5-Y5 S2p core orbitals.

| Energy (eV)                | Functional Group | Core Orbital                                                                         |
|----------------------------|------------------|--------------------------------------------------------------------------------------|
| 166.40<br>166.28<br>166.16 | S-N (BT)         | 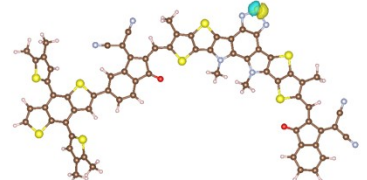 |

|                                                          |             |                                                                                     |
|----------------------------------------------------------|-------------|-------------------------------------------------------------------------------------|
| 165.34<br>165.23<br>165.22<br>165.09                     | S-C (outer) | 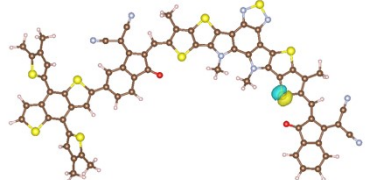  |
| 165.36<br>165.26<br>165.16<br>165.10                     | S-C (inner) |   |
| 164.92<br>164.87<br>164.82<br>164.77<br>164.70           | BDT (fused) |   |
| 164.84<br>164.74<br>164.71<br>164.63<br>164.61<br>164.49 | BDT (side)  |  |



**Table S3:** Atomic percentage of PBDB-T, Y5, and PF5-Y5 for fresh, 2 hr, and 10 hr, extracted from the survey XPS spectra by CASA XPS.

|                                                                                                    | Element and Line                                                                             | Expected | Fresh | 2 hr  | 30 hr |
|----------------------------------------------------------------------------------------------------|----------------------------------------------------------------------------------------------|----------|-------|-------|-------|
| <b>PBDB-T</b><br>(C <sub>68</sub> H <sub>78</sub> O <sub>2</sub> S <sub>8</sub> )                  | C1s                                                                                          | 87.17    | 87.23 | 85.37 | 78.37 |
|                                                                                                    | O1s                                                                                          | 2.56     | 1.51  | 4.22  | 13.08 |
|                                                                                                    | S2p                                                                                          | 10.25    | 11.26 | 10.24 | 8.55  |
|                                                                                                    | In3d                                                                                         | 0.00     | 0.00  | 0.11  | 0.00  |
|                                                                                                    | Sn3d                                                                                         | 0.00     | 0.00  | 0.00  | 0.00  |
|                                                                                                    | <b>Y5</b><br>(C <sub>82</sub> H <sub>90</sub> N <sub>8</sub> O <sub>2</sub> S <sub>5</sub> ) | C1s      | 86.31 | 79.78 | 82.48 |
| N1s                                                                                                |                                                                                              | 8.42     | 7.25  | 5.08  | 5.75  |
| O1s                                                                                                |                                                                                              | 2.10     | 7.94  | 6.53  | 5.13  |
| S2p                                                                                                |                                                                                              | 5.26     | 3.54  | 5.14  | 7.20  |
| In3d                                                                                               |                                                                                              | 0.00     | 1.42  | 0.71  | 0.17  |
| Sn3d                                                                                               |                                                                                              | 0.00     | 0.07  | 0.06  | 0.00  |
| <b>PF5-Y5</b><br>(C <sub>128</sub> H <sub>154</sub> N <sub>8</sub> O <sub>2</sub> S <sub>9</sub> ) | C1s                                                                                          | 87.07    | 84.53 | 84.78 | 80.72 |
|                                                                                                    | N1s                                                                                          | 5.44     | 6.00  | 4.16  | 4.58  |
|                                                                                                    | O1s                                                                                          | 1.36     | 3.95  | 5.95  | 9.50  |
|                                                                                                    | S2p                                                                                          | 6.12     | 5.43  | 5.12  | 5.19  |
|                                                                                                    | In3d                                                                                         | 0.00     | 0.08  | 0.00  | 0.00  |
|                                                                                                    | Sn3d                                                                                         | 0.00     | 0.00  | 0.00  | 0.00  |

**Table S4:** Assignment of components and their relative contributions in the XPS C 1s and S 2p core level spectra of PBDB-T, Y5 and PF5-Y5 in Figure 3.

| Orbital      | PBDB-T                                           |          | Y5                                  |                                                  | PF5-Y5                                           |          |
|--------------|--------------------------------------------------|----------|-------------------------------------|--------------------------------------------------|--------------------------------------------------|----------|
|              | Binding energy (eV)                              | Area (%) | Binding energy (eV)                 | Area (%)                                         | Binding energy (eV)                              | Area (%) |
| C 1s (0 hr)  | 285.10 (C-C, C=C)                                | 93.04    | 284.78 (C-C, C=C)                   | 77.75                                            | 284.68 (C-C, C=C)                                | 83.97    |
|              | 286.64 (C-S), (C=O)                              | 6.96     | 286.26 (C-S), (C-N),<br>(C=O)       | 22.25                                            | 286.18 (C-S), (C=N),<br>(C=O)                    | 16.03    |
| C 1s (30 hr) | 285.18 (C-C, C=C)                                | 79.43    | 284.78 (C-C, C=C)                   | 76.46                                            | 284.68 (C-C, C=C)                                | 74.20    |
|              | 286.68 (C-S), (C=O)                              | 10.76    | 286.26 (C-S), (C-N),<br>(C=O)       | 23.54                                            | 286.18 (C-S), (C-N),<br>(C=O)                    | 18.66    |
|              | 288.64 (Anhydride)                               | 9.82     |                                     |                                                  | 288.18 (Anhydride)                               | 7.14     |
| S 2p (0 hr)  | 164.13 (S 2p <sub>3/2</sub> ) (C-S)              | 66.67    | 164.08 (S 2p <sub>3/2</sub> ) (C-S) | 54.30                                            | 163.74 (S 2p <sub>3/2</sub> ) (C-S)              | 56.10    |
|              | 165.31 (S 2p <sub>1/2</sub> ) (C-S)              | 33.33    | 165.26 (S 2p <sub>1/2</sub> ) (C-S) | 27.15                                            | 164.92 (S 2p <sub>1/2</sub> ) (C-S)              | 28.05    |
|              |                                                  |          | 164.82 (S 2p <sub>3/2</sub> ) (N-S) | 12.37                                            | 164.48 (S 2p <sub>3/2</sub> ) (N-S)              | 10.57    |
|              |                                                  |          | 166.00 (S 2p <sub>1/2</sub> ) (N-S) | 6.18                                             | 165.66 (S 2p <sub>1/2</sub> ) (N-S)              | 5.28     |
| S 2p (30 hr) | 164.42 (S 2p <sub>3/2</sub> ) (C-S)              | 59.71    | 164.00 (S 2p <sub>3/2</sub> ) (C-S) | 55.50                                            | 163.94 (S 2p <sub>3/2</sub> ) (C-S)              | 46.95    |
|              | 165.60 (S 2p <sub>1/2</sub> ) (C-S)              | 29.85    | 165.18 (S 2p <sub>1/2</sub> ) (C-S) | 27.75                                            | 165.12 (S 2p <sub>1/2</sub> ) (C-S)              | 23.47    |
|              | 169.12 (S 2p <sub>3/2</sub> ) (SO <sub>x</sub> ) | 6.96     | 164.76 (S 2p <sub>3/2</sub> ) (N-S) | 11.17                                            | 164.68 (S 2p <sub>3/2</sub> ) (N-S)              | 8.05     |
|              | 169.30 (S 2p <sub>1/2</sub> ) (SO <sub>x</sub> ) | 3.483    | 165.94 (S 2p <sub>1/2</sub> ) (N-S) | 5.58                                             | 165.86 (S 2p <sub>1/2</sub> ) (N-S)              | 4.02     |
|              |                                                  |          |                                     |                                                  | 167.74 (S 2p <sub>3/2</sub> ) (SO <sub>x</sub> ) | 11.67    |
|              |                                                  |          |                                     | 168.92 (S 2p <sub>1/2</sub> ) (SO <sub>x</sub> ) | 5.84                                             |          |

**Table S5:** The valence band onset ( $V_{b_{\text{onset}}}$ ), positions of Fermi level ( $E_f$ ), and highest occupied molecular orbital (HOMO) of PBDB-T, Y5, and PF5-Y5 for 0 hr, 2hr, and 30 hr exposure time. The valence band onset is measured by UPS and the position of the Fermi level ( $E_f$ ), with respect to the vacuum level, (i.e. the work function) is extracted from the secondary electron cut-off (SECO) in the UPS spectra (figure S11).

| <b>Sample</b>         | <b><math>V_{b_{\text{onset}}}</math><br/>(eV)</b> | <b>Fermi level,<br/><math>E_f</math>(eV)</b> | <b>*HOMO<br/>(eV)</b> |
|-----------------------|---------------------------------------------------|----------------------------------------------|-----------------------|
| <b>PBDB-T (0 hr)</b>  | 1.06                                              | -4.03                                        | -5.09                 |
| <b>PBDB-T (2 hr)</b>  | 0.61                                              | -4.53                                        | -5.14                 |
| <b>PBDB-T (30 hr)</b> | 0.57                                              | -4.90                                        | -5.47                 |
| <b>Y5 (0 hr)</b>      | 0.92                                              | -4.80                                        | -5.72                 |
| <b>Y5 (2 hr)</b>      | 0.85                                              | -4.85                                        | -5.70                 |
| <b>Y5 (30 hr)</b>     | 0.79                                              | -4.92                                        | -5.71                 |
| <b>PF5-Y5 (0 hr)</b>  | 1.07                                              | -4.50                                        | -5.57                 |
| <b>PF5-Y5 (2 hr)</b>  | 0.99                                              | -4.70                                        | -5.69                 |
| <b>PF5-Y5 (30 hr)</b> | 0.75                                              | -4.90                                        | -5.65                 |

\*HOMO=  $E_f + V_{b_{\text{onset}}}$
